# Supplementary material for: A grafted flame-retardant gel polymer electrolyte stabilizing lithium metal for high-safety lithium metal batteries
Source: Royal Society of Chemistry journal article supplement (doi:10.1039/d4ta04343j), 2024-01-01
Supplement: d4ta04343j1.pdf [file d4ta04343j1.pdf]

Electronic Supplementary Information (ESI) for

**A Grafted Flame-retardant Gel Polymer Electrolyte Stabilizing Lithium Metal for  
High-safety Lithium Metal Battery**

*Shaoshan Chen <sup>a</sup>, Yong Wang <sup>a</sup>, Zhongxiu Li <sup>a</sup>, Yiyui Feng <sup>a</sup> and Wei Feng <sup>a,b \*</sup>*

<sup>a</sup>School of Materials Science and Engineering, Tianjin University, Tianjin 300072, P. R. China

<sup>b</sup>Key Laboratory of Advanced Ceramics and Machining Technology Ministry of Education, Tianjin  
300072, P. R. China

\*Corresponding authors: [weifeng@tju.edu.cn](mailto:weifeng@tju.edu.cn)

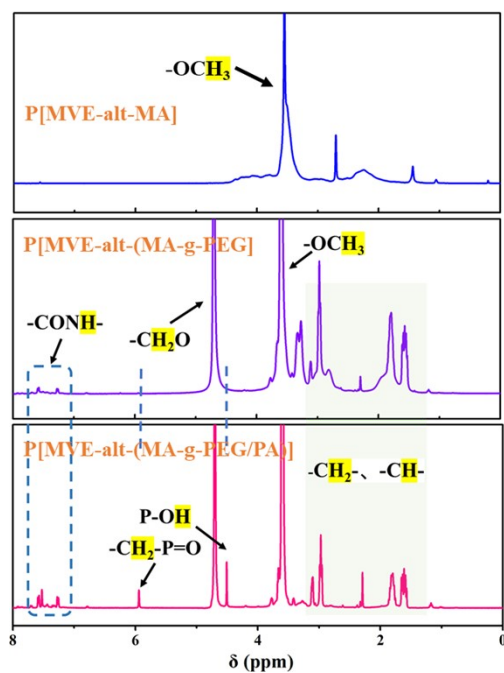

Figure S1 The  $^1\text{H}$  NMR spectrum of P[MVE-alt-MA], P[MVE-alt-(MA-g-PEG)] and P[MVE-alt-(MA-g-PEG/PA)]

In comparison with P[MVE-alt-MA], P[MVE-alt-(MA-g-PEG)] exhibited characteristic peaks of  $-\text{CH}_2\text{O}$  (4.7 ppm) and  $-\text{CONH}-$  (7.2~7.7 ppm), confirming the grafting of the  $\text{NH}_2\text{-PEG-NH}_2$ .

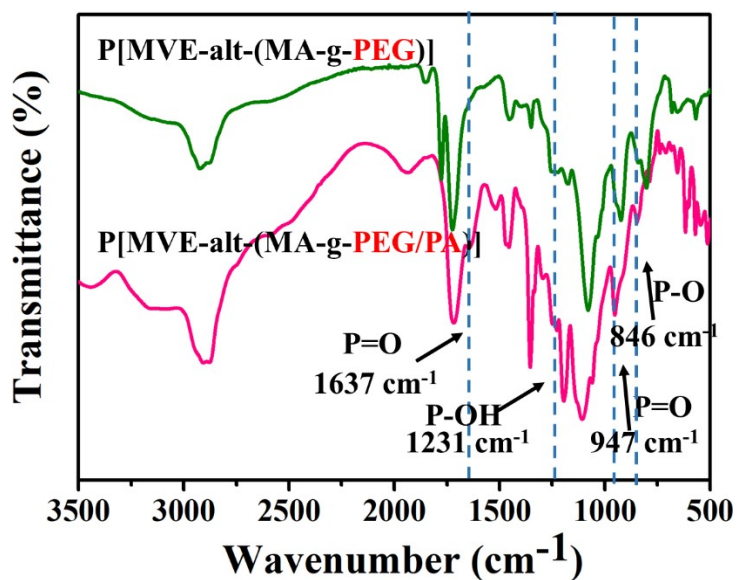

Figure S2 The FT-IR spectrum of P[MVE-alt-(MA-g-PEG)] and P[MVE-alt-(MA-g-PEG/PA)]

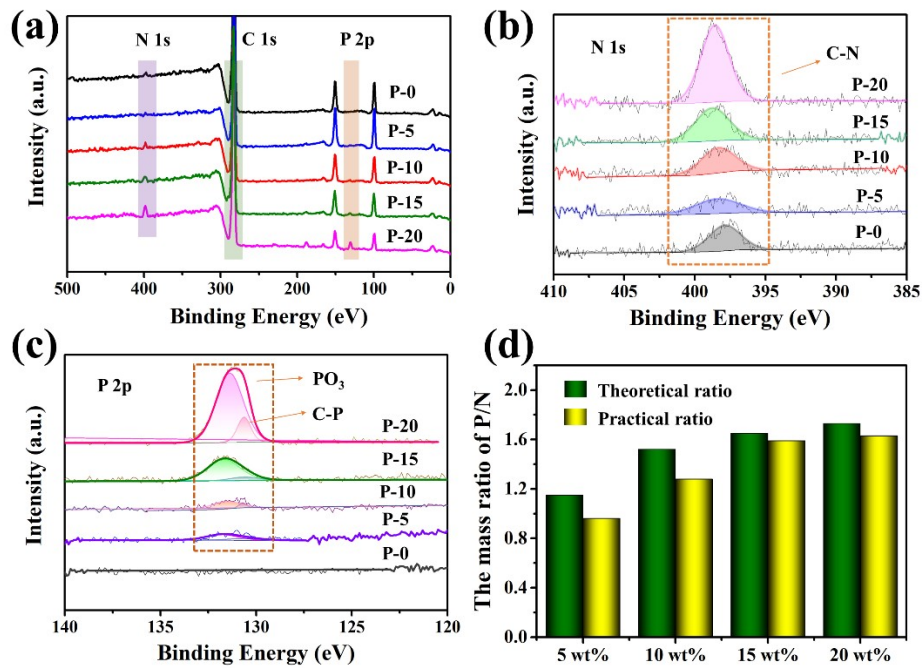

**Figure S3** (a) XPS spectra, (b) N1s spectra and (c) P 2p spectra of P-0, 5, 10, 15 and 20. (d) Theoretical and practical mass ratios of P/N elements in P-0, 5, 10, 15 and 20

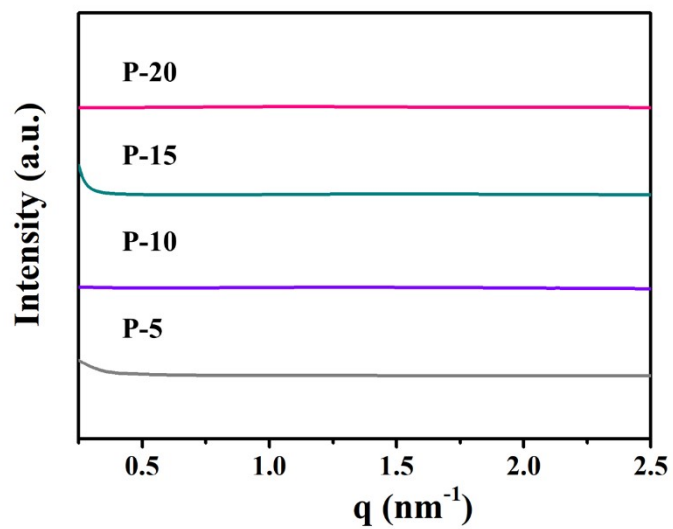

**Figure S4** SAXS spectra of P-5, 10, 15 and 20

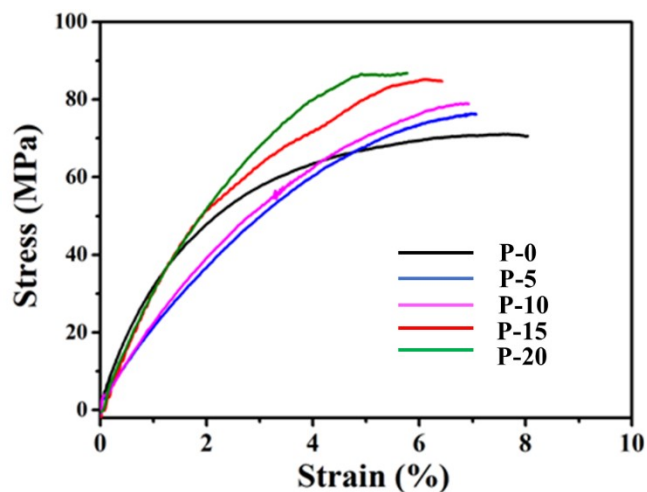

**Figure S5** The stress-strain curves of different P[MVE-alt-(MA-g-PEG/PA)] films

The stress-strain profiles of different P[MVE-alt-(MA-g-PEG/PA)] films are shown in FigureS4. With the increase of 3-APPA, there is a decrease in percentage of breaking elongation and an increase in tensile strength.

**(a) C-GPE-15**

**The first application of the flame:**

**Self-extinguishing Time: 22 s**

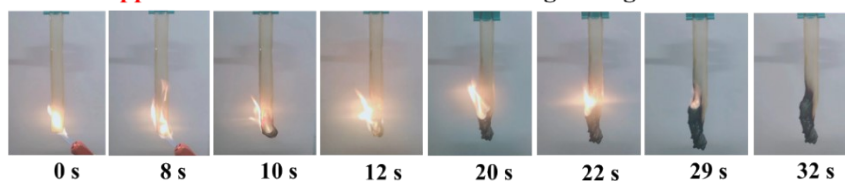

**The second application of the flame:**

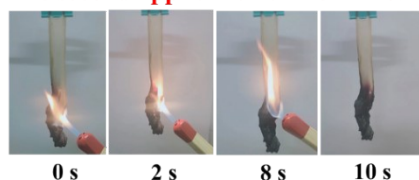

**(b) C-GPE-0**

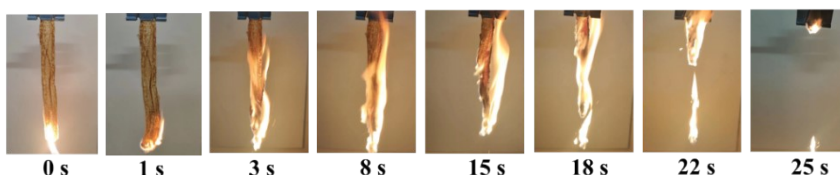

**(c) LE**

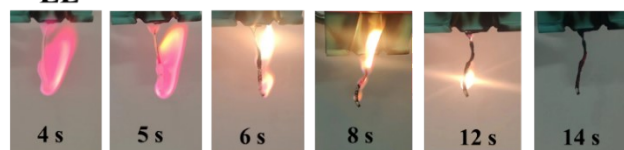

**Figure S6.** Video screenshots of C-GPE-15, C-GPE-0 and LE during the UL-94 test

## C-GPE-20

**The first application of the flame** Self-extinguishing Time: 19 s

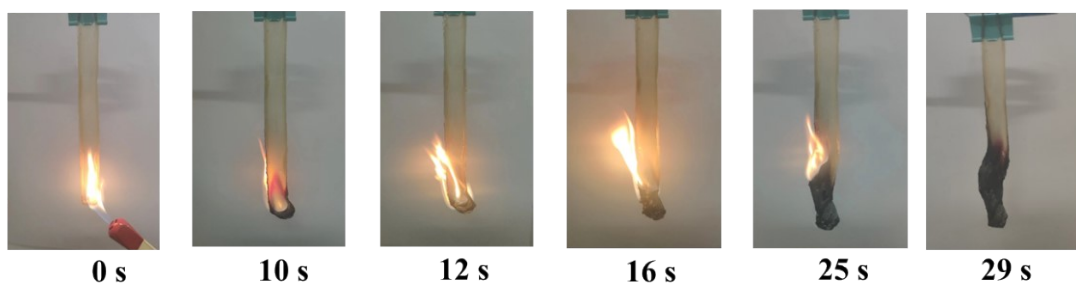

Figure S7 Video screenshots of C-GPE-20 during the UL-94 test

Table S1 Summary of Flame Retardancy Grades of C-GPE

| Sample     | $t_1$       | $t_2$       | UL-94 grade |
|------------|-------------|-------------|-------------|
| Standard-1 | $\leq 10$ s | $\leq 30$ s | V-0         |
| Standard-2 | $\leq 30$ s | $\leq 60$ s | V-1         |
| C-GPE-15   | 22 s        | /           | V-1         |
| C-GPE-20   | 19 s        | /           | V-1         |

$t_1$  was flame duration of the first application of the flame.

$t_2$  was flame duration of the second application of the flame.

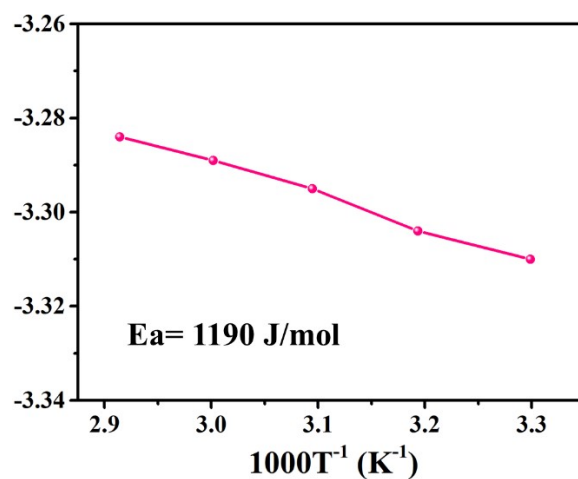

Figure S8 Fitting curve of the Arrhenius equation about  $\sigma_{Li+}$  and temperature for C-GPE-15

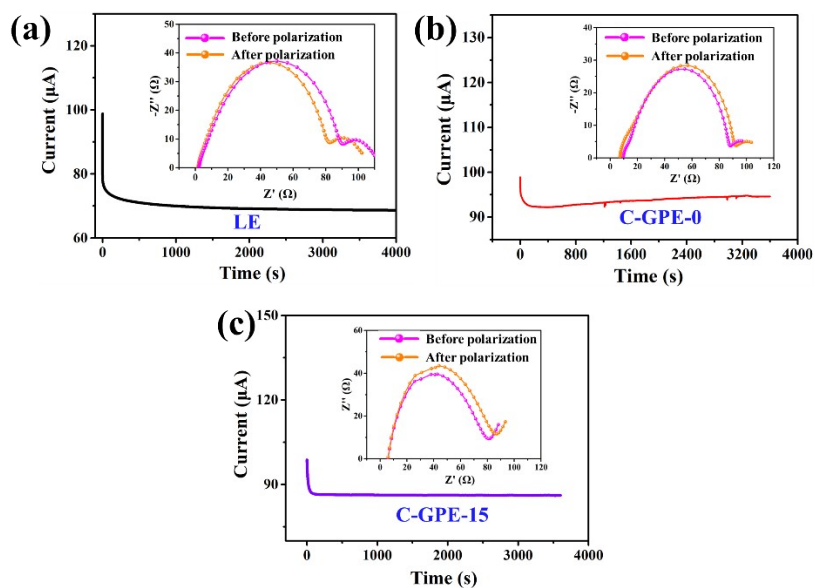

**Figure S9** Polarization curves and EIS plots before and after polarization of LE, C-GPE-0 and C-GPE-15 at 30 °C

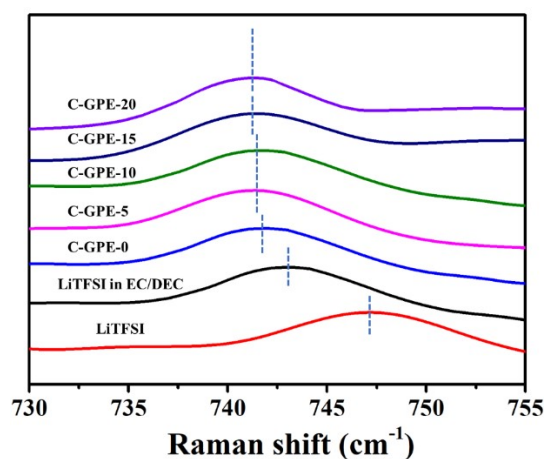

**Figure S10** The Raman curves of LiTFSI, LiTFSI in EC/DEC, C-GPE-0, C-GPE-5, C-GPE-10, C-GPE-15 and C-GPE-20

The Raman spectrum observed between 730 and 755  $\text{cm}^{-1}$  corresponds to the vibrational modes of TFSI<sup>-</sup> (including S – N stretching, C – S stretching, and  $\text{CF}_3$  bending), where bands at 740 and 747  $\text{cm}^{-1}$  were assigned to free TFSI<sup>-</sup> and coordinated TFSI<sup>-</sup>, respectively [1]. With the grafting of PEG and 3-APPA, the Raman peak of the electrolyte shifts to the low shift, which means that there is more free TFSI<sup>-</sup> in the electrolytes.

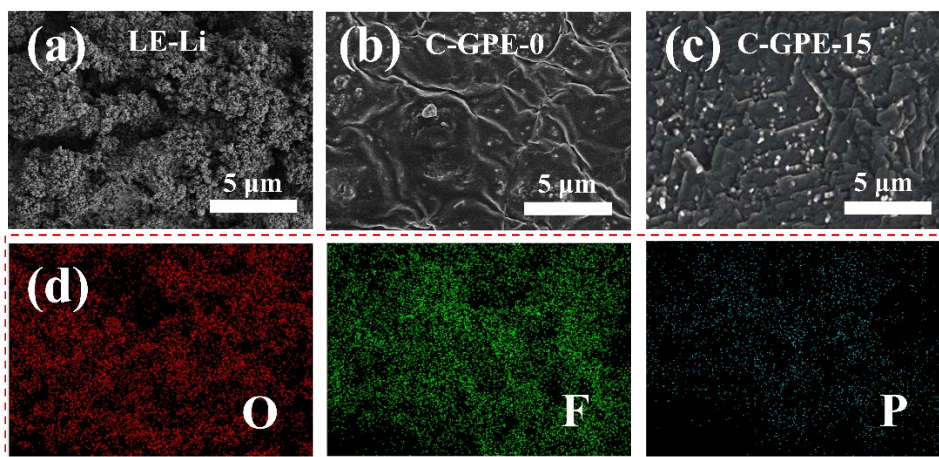

**Figure S11** SEM images of Li anode in Li symmetrical cells with LE, C-GPE-0 and C-GPE-15 after 100 h; (h) EDS mapping of the SEM images of the Li surface collected from Li|C-GPE-15|Li after 100 h

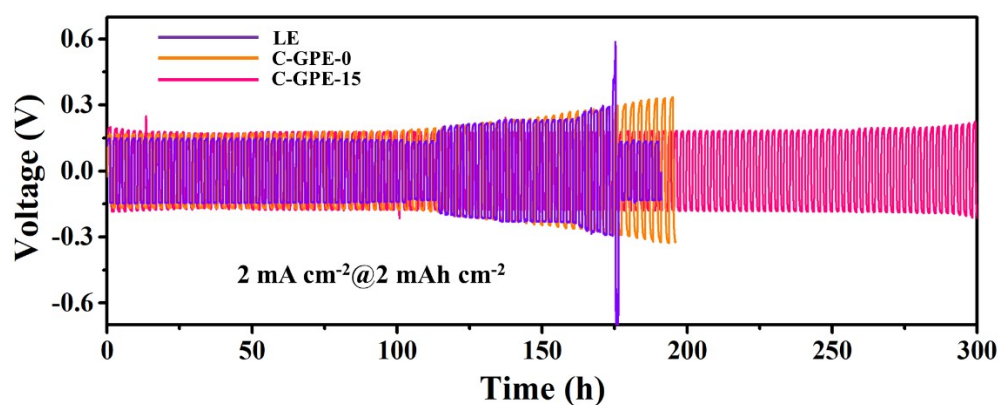

**Figure S12** Galvanostatic plating/stripping curves of Li symmetrical cells with LE, C-GPE-0 and C-GPE-15 at  $2 \text{ mA cm}^{-2}$  @  $2 \text{ mAh cm}^{-2}$  upon  $30 \text{ }^\circ\text{C}$

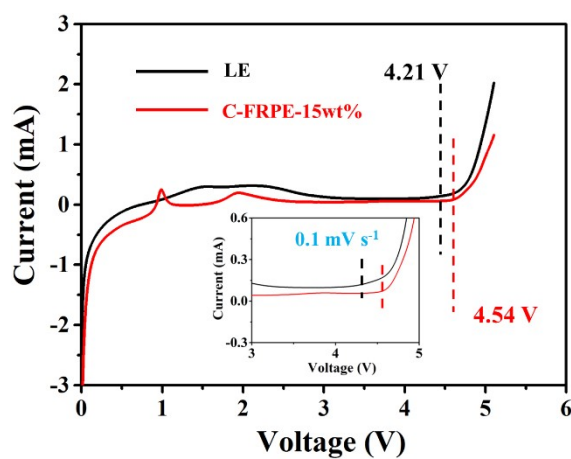

**Figure S13** LSV curves of C-GPE-15 and LE

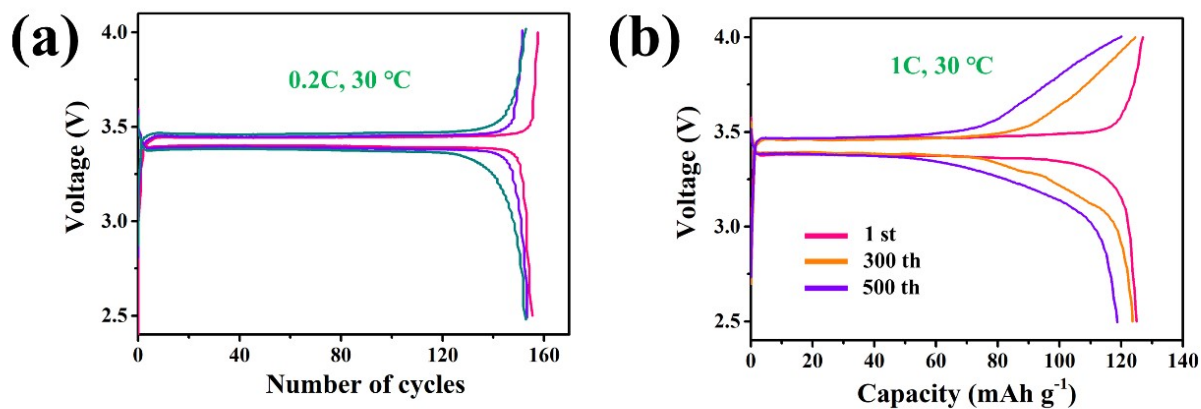

Figure S14 (a) Charge and discharge profiles of LFP/C-GPE-15/Li at 0.2 C and 1 C

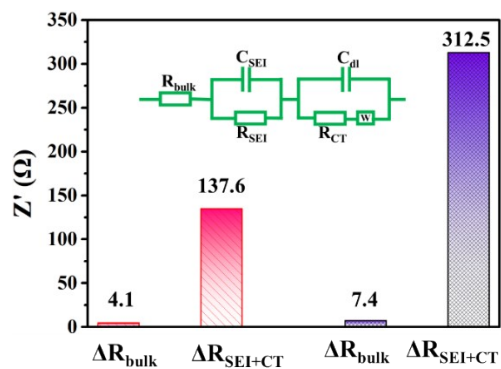

Figure S15 Impedance changes of LFP/C-GPE-15/Li and LFP/LE/Li before and after cycling at 0.5 C and 60 °C



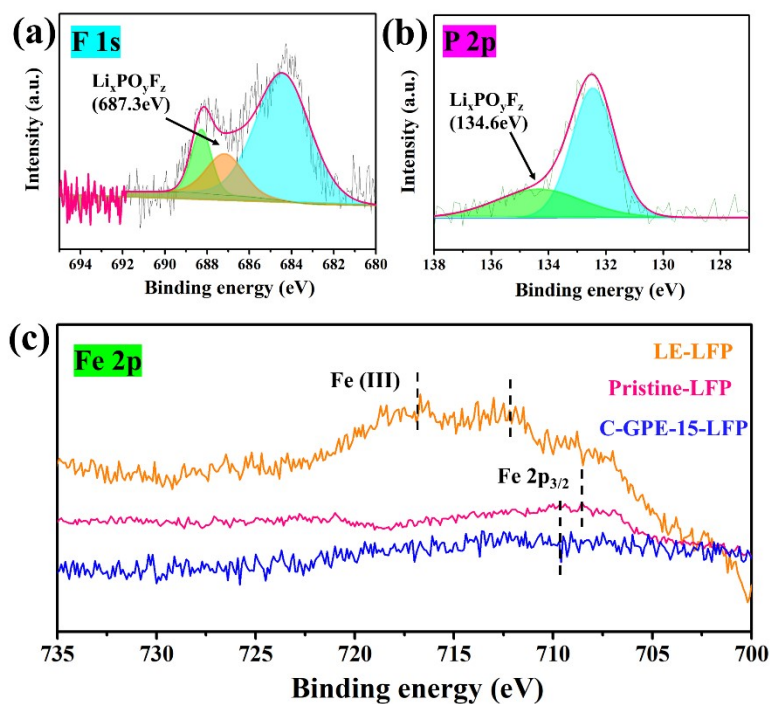

**Figure S16** XPS spectrum of (a) F 1s, (b) P 2p in LFP|C-GPE-15|Li after 50 cycles at 0.2 C; (c) XPS spectrum of Fe 2p in pristine LFP, LFP in LFP|LE|Li and LFP|C-GPE-15|Li after 50 cycles at 0.2 C

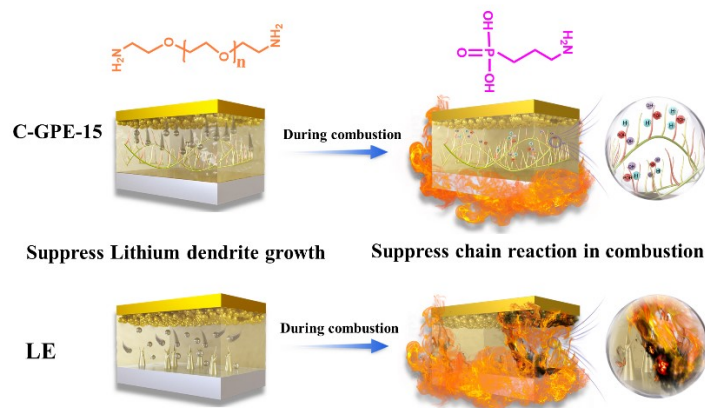

**Figure S17.** Schematic diagram for highly safe characteristic LMBs with C-GPE-15

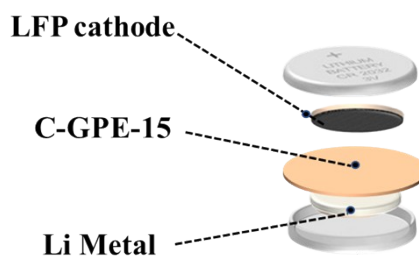

**Figure S18** The assembly of Li || C-GPE-15 || LFP batteries

**Table S2** Comparison of the ionic conductivity ( $\sigma$ ) and  $\text{Li}^+$  transference number ( $t_{\text{Li}^+}$ ) of C-ASPE-5/8 with those of the previously reported Flame-retardant polymer electrolytes [2-6].

|                          | Type of electrolytes | $\sigma/\text{mS cm}^{-1}$ | Cyclic performance (cycles; capacity retention rate) |
|--------------------------|----------------------|----------------------------|------------------------------------------------------|
| C-GPE-15                 | GPEs                 | 0.541                      | 200 cycles at 0.5 C ; 95.2%                          |
| PEG-TEP-TiO <sub>2</sub> | GPEs                 | 0.251                      | 200 cycles at 0.2 C ; 84%                            |
| SOTA GPEs                | GPEs                 | /                          | 50 cycles at 0.2 C ; 96%                             |
| FRPMM-CPE                | GPEs                 | /                          | 240 cycles; 98%                                      |
| IFR-SPE                  | SPEs                 | 0.28                       | 200 cycles; 94.8%                                    |
| PEO/LiTFSI/15%AD         | SPEs                 | 0.037                      | 350 cycles; 92.1%                                    |
| P                        |                      |                            |                                                      |

## References

- [1] K. Jang, H. Song, J. Park, S. Jung and D. Kim, *Energy Environ. Sci.*, 2024, 17, 4622-4633.
- [2] J. Guo, Y. Chen, Y. Xiao, C. Xi, G. Xu, B. Li, C. Yang and Y. Yu, *Chemical Engineering Journal*, 2021, **422**, 130526.
- [3] H. Jia, H. Onishi, R. Wagner, M. Winter, and I. Cekic-Laskovic, *ACS Appl. Mater. Interfaces*, 2018.
- [4] J. Yang, M. Zhang, Z. Chen, X. Du, S. Huang, B. Tang, T. Dong, H. Wu, Z. Yu, J. Zhang, and G. Cui. *Nano Res.*, 2019, 12(9): 2230-2237.
- [5] H. Li, J. Yang, S. Chen, Z. Xu, J. Wang, Y. Nuli, Y. Guo and C. Liang, *Chemical Engineering Journal*, 2021, **410**, 128415
- [6] L. Han, C. Liao, X. Mu, N. Wu, Z. Xu, J. Wang, L. Song, Y. Kan and Y. Hu, *Nano Lett.* 2021, **21**,

4447-4453.
